# Supplementary material for: Advanced Integration of Glutathione-Functionalized Optical Fiber SPR Sensor for Ultra-Sensitive Detection of Lead Ions
Source: MDPI journal article supplement (doi:10.3390/ma17010098), 2023-12-24
Supplement: s1 [file s1]

Article

# Advanced Integration of Glutathione-Functionalized Optical Fiber SPR Sensor for Ultra-Sensitive Detection of Lead Ions

Jiale Wang <sup>1,†</sup>, Kunpeng Niu <sup>1,†</sup>, Jianguo Hou <sup>1</sup>, Ziyang Zhuang <sup>1</sup>, Jiayi Zhu <sup>1</sup>, Xinyue Jing <sup>1</sup>, Ning Wang <sup>1,\*</sup>, Binyun Xia <sup>1,\*</sup> and Lei Lei <sup>2</sup>

## Supplementary Materials

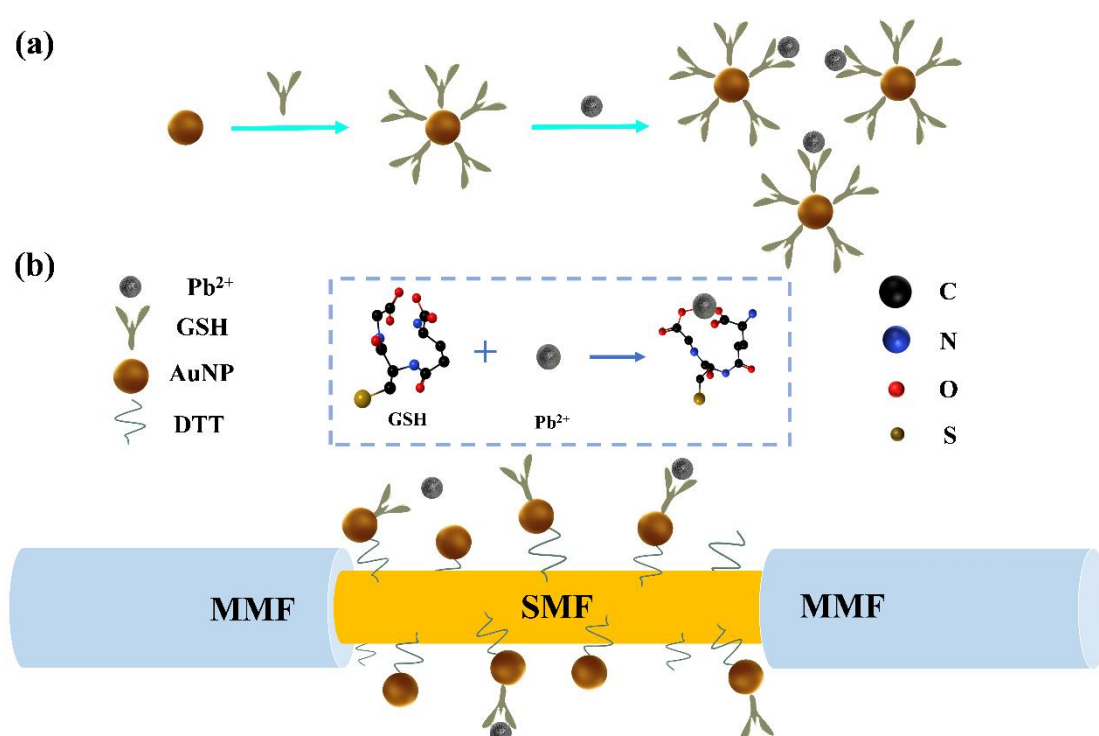

Figure S1. The mechanism of GSH-specific capturing  $Pb^{2+}$ .

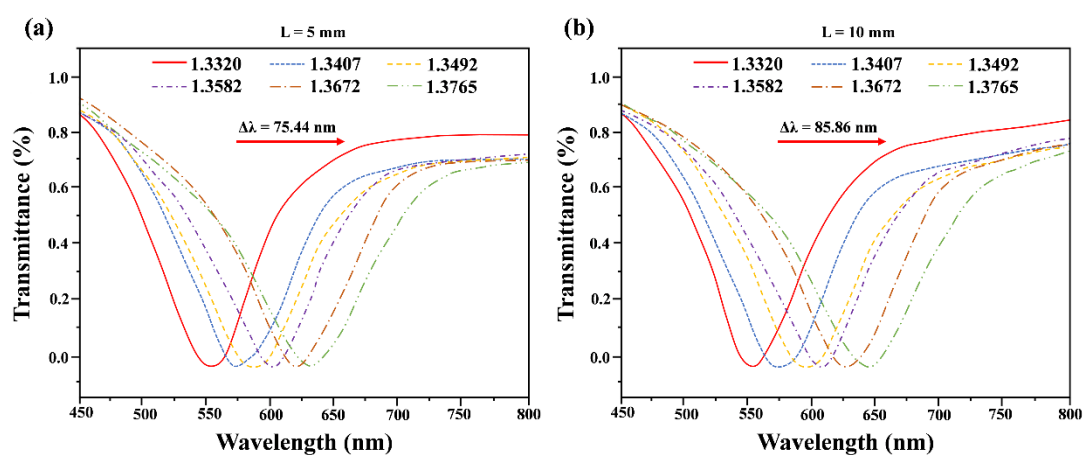

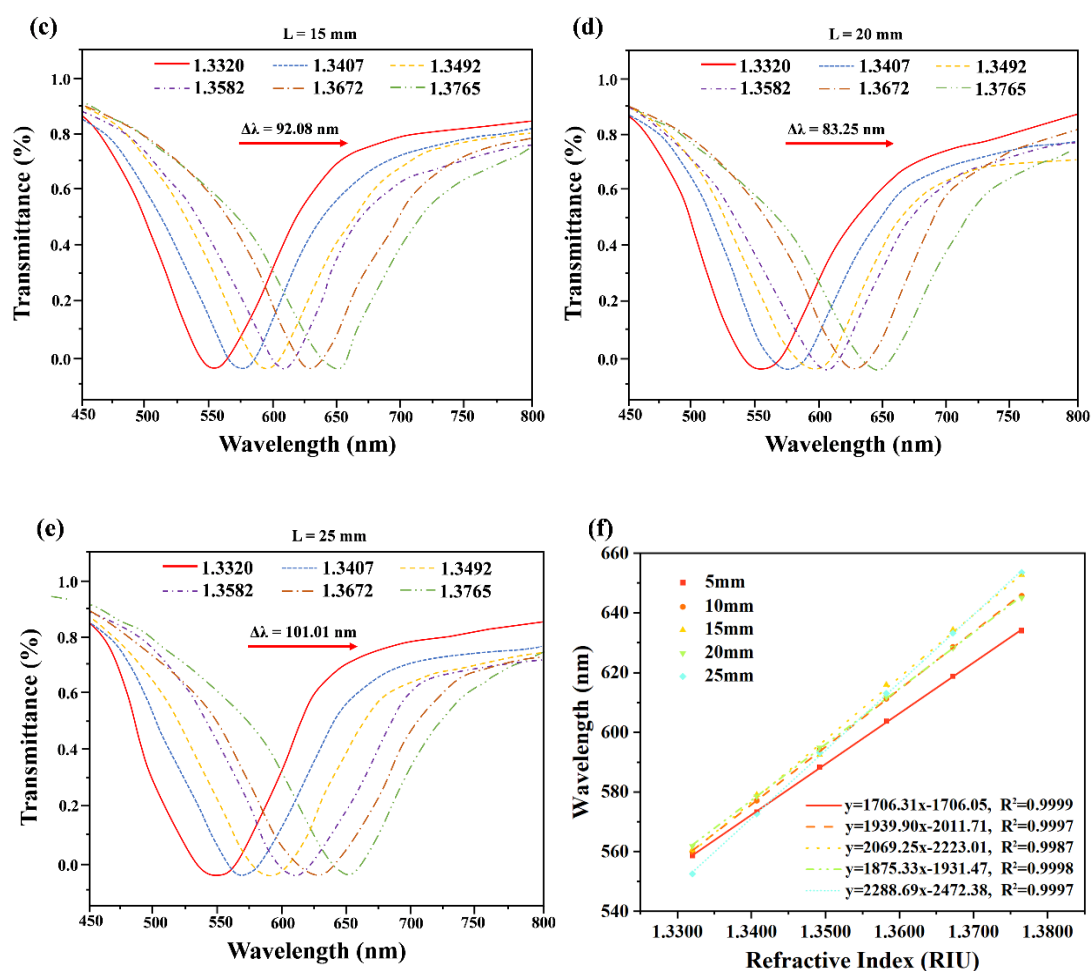

**Figure S2.** Measured normalized spectra of MMF-SMF-MMF structures with different sensing lengths: (a) 5mm, (b) 10mm, (c) 15mm, (d) 20mm, (e) 25mm. (f) Plots of surface plasmon resonance peak wavelength versus refractive index for sensors with different sensing lengths.

**Table S1.** Wavelength values at the resonance valley of sensors with different sensing lengths at different refractive index values.

| Refractive index (RIU) | Resonance wavelength h (5mm) | Resonance wavelength h (10mm) | Resonance wavelength h (15mm) | Resonance wavelength h (20mm) | Resonance wavelength h (25mm) |
|------------------------|------------------------------|-------------------------------|-------------------------------|-------------------------------|-------------------------------|
| 1.3320                 | 558.71                       | 559.93                        | 560.74                        | 561.94                        | 552.62                        |
| 1.3407                 | 573.39                       | 577.20                        | 579.16                        | 578.63                        | 572.75                        |
| 1.3492                 | 588.41                       | 594.34                        | 592.57                        | 594.96                        | 593.21                        |
| 1.3582                 | 603.76                       | 611.33                        | 616.01                        | 611.84                        | 613.14                        |
| 1.3672                 | 618.84                       | 628.67                        | 634.41                        | 628.38                        | 633.29                        |
| 1.3765                 | 634.15                       | 645.79                        | 652.82                        | 645.19                        | 653.63                        |

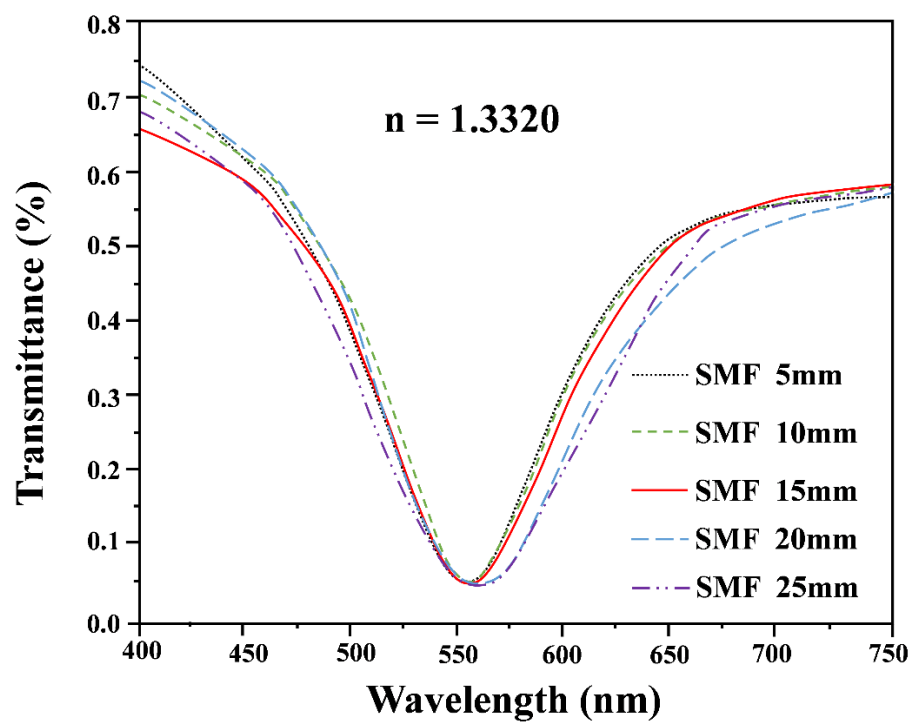

Figure S3. Transmittance spectra of sensor of different sensing lengths at  $n=1.3320$ .

Table S2. Parameters of gold-plated fiber SPR sensors with different sensing lengths at refractive index value of 1.3320.

| L(mm) | $S_n$ (nm/RIU) | FWHM (nm) | FOM |
|-------|----------------|-----------|-----|
| 5     | 1706.31        | 65.62     | 26  |
| 10    | 1939.90        | 62.58     | 31  |
| 15    | 2069.25        | 66.75     | 31  |
| 20    | 1875.33        | 78.24     | 24  |
| 25    | 2288.69        | 108.99    | 21  |

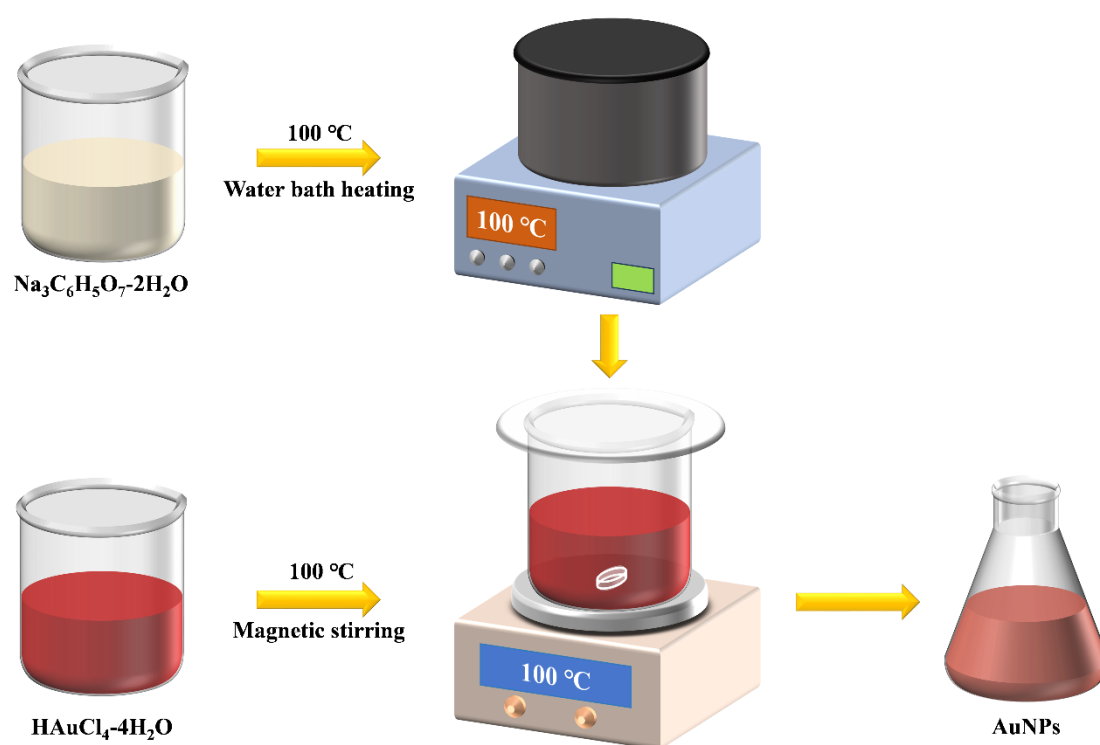

**Figure S4.** The preparation of AuNPs.

The preparation process of AuNPs is shown in Fig. S1. A solution of  $2.9 \times 10^{-4}$  M chloroauric acid tetrahydrate ( $\text{HAuCl}_4 \cdot 4\text{H}_2\text{O}$ ) and a solution of  $3.88 \times 10^{-2}$  M sodium citrate ( $\text{Na}_3\text{C}_6\text{H}_5\text{O}_7 \cdot 2\text{H}_2\text{O}$ ) were prepared in deionized water. The sodium citrate solution was heated to  $100^\circ\text{C}$  in a water bath and then left to stand. Next, a 50 ml  $\text{HAuCl}_4 \cdot 4\text{H}_2\text{O}$  ( $2.9 \times 10^{-4}$  M) solution was sealed with plastic wrap, vigorously stirred on a thermostatic magnetic stirrer, and heated to  $100^\circ\text{C}$ . Then, 3 ml of  $\text{Na}_3\text{C}_6\text{H}_5\text{O}_7 \cdot 2\text{H}_2\text{O}$  ( $3.88 \times 10^{-2}$  M) solution was added, and stirring was continued for 8 min. The solution changed to burgundy color, indicating the successful synthesis of AuNPs (20 nm in diameter).

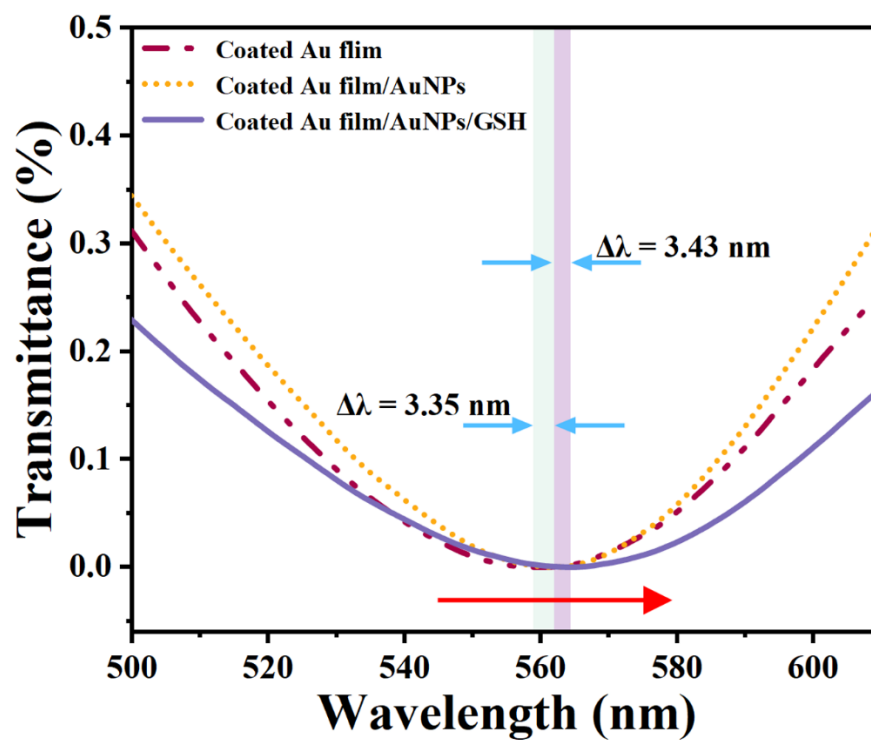

Figure S5. The SPR wavelength variation of the hetero-core fiber coated with Au film, Au film/AuNPs, and Au film/AuNPs/GSH.

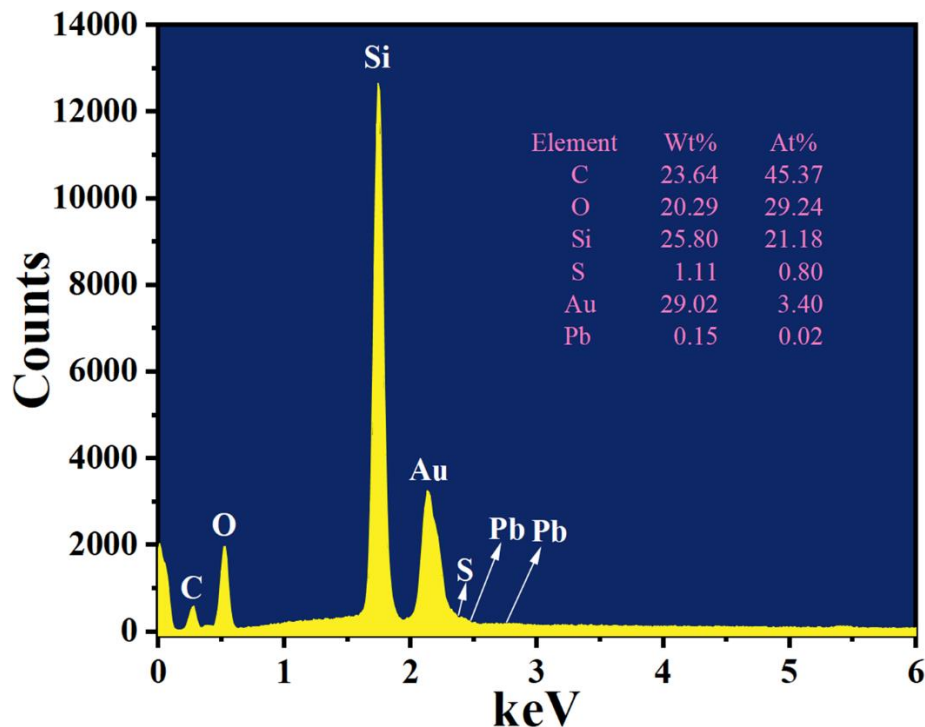

Figure S6. The elemental distribution on the optical fiber sensor after capturing the  $Pb^{2+}$ .

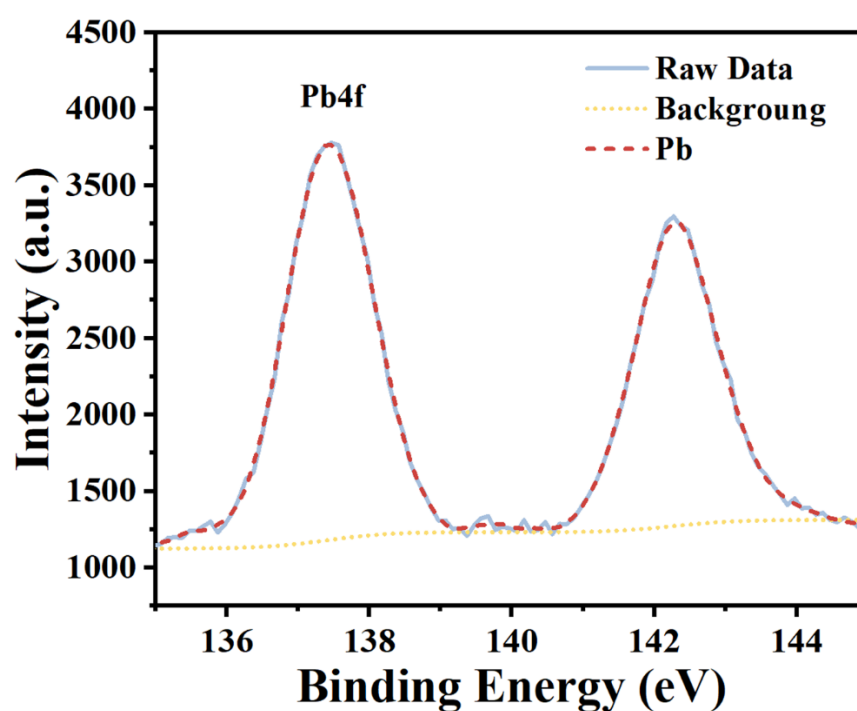

**Figure S7.** High-resolution Pb4f spectrum of AuNPs/GSH-modified SPR optical fiber after the addition of Pb<sup>2+</sup>.

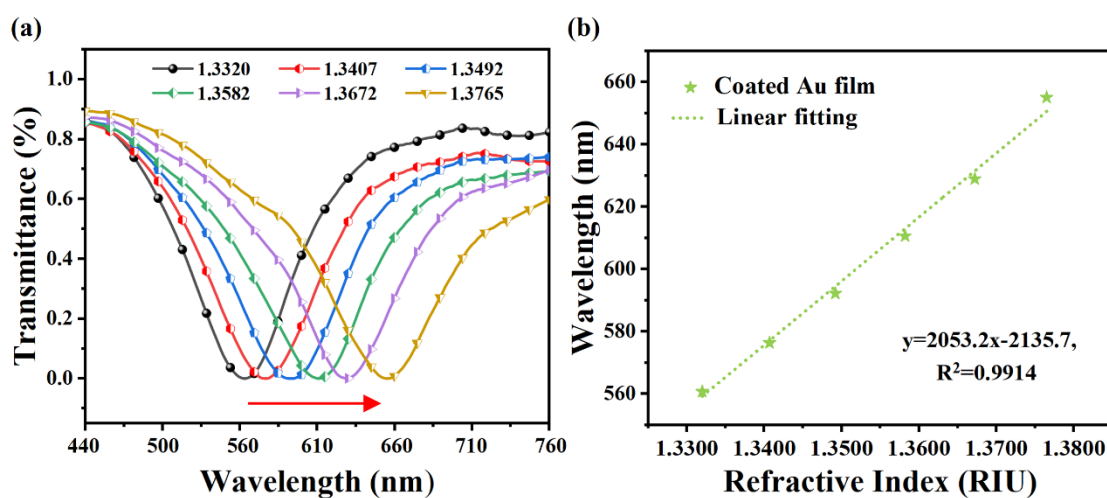

**Figure S8.** RI sensitivity measurement of the sensor coated with pure Au-film. (a) Transmission spectra of the sensor coated with pure Au-film in NaCl solutions with different RI. (b) The linear fitting curve of the sensor coated with pure Au-film.

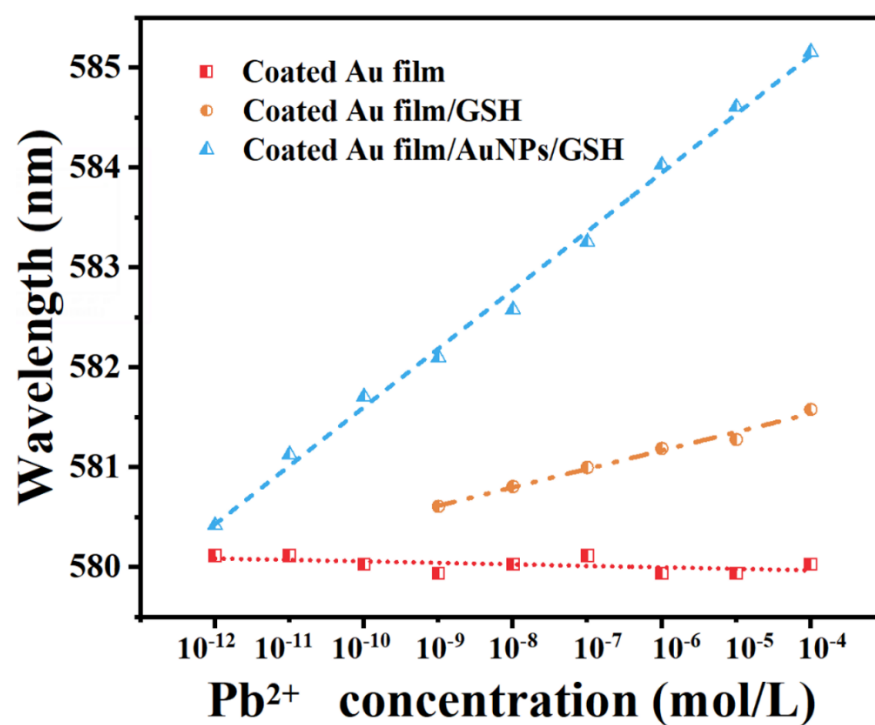

Figure S9. Variations in wavelength of the sensors at different  $Pb^{2+}$  concentrations.

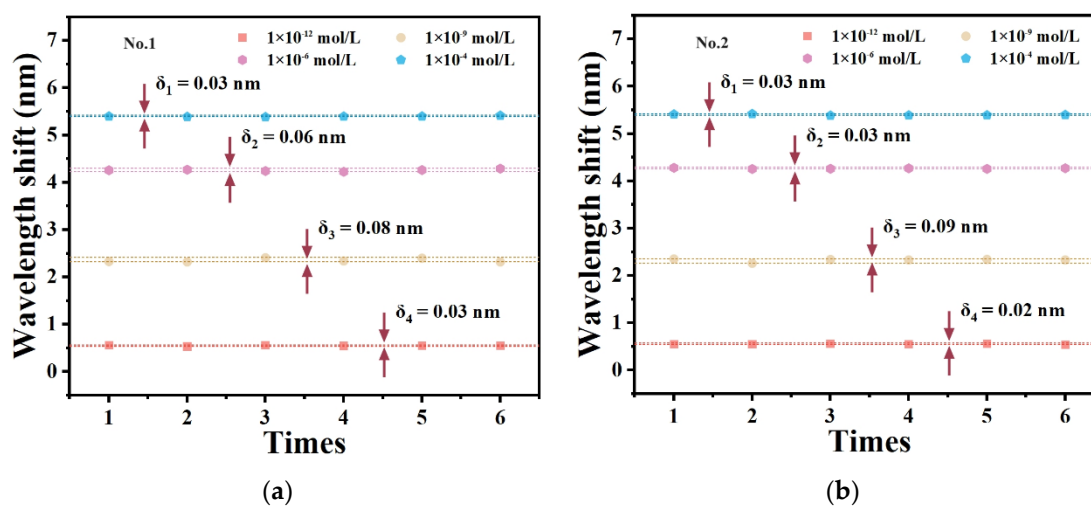

Figure S10. (a) No.1 of repeatability of the proposed sensor. (b) No.2 of repeatability of the proposed sensor.

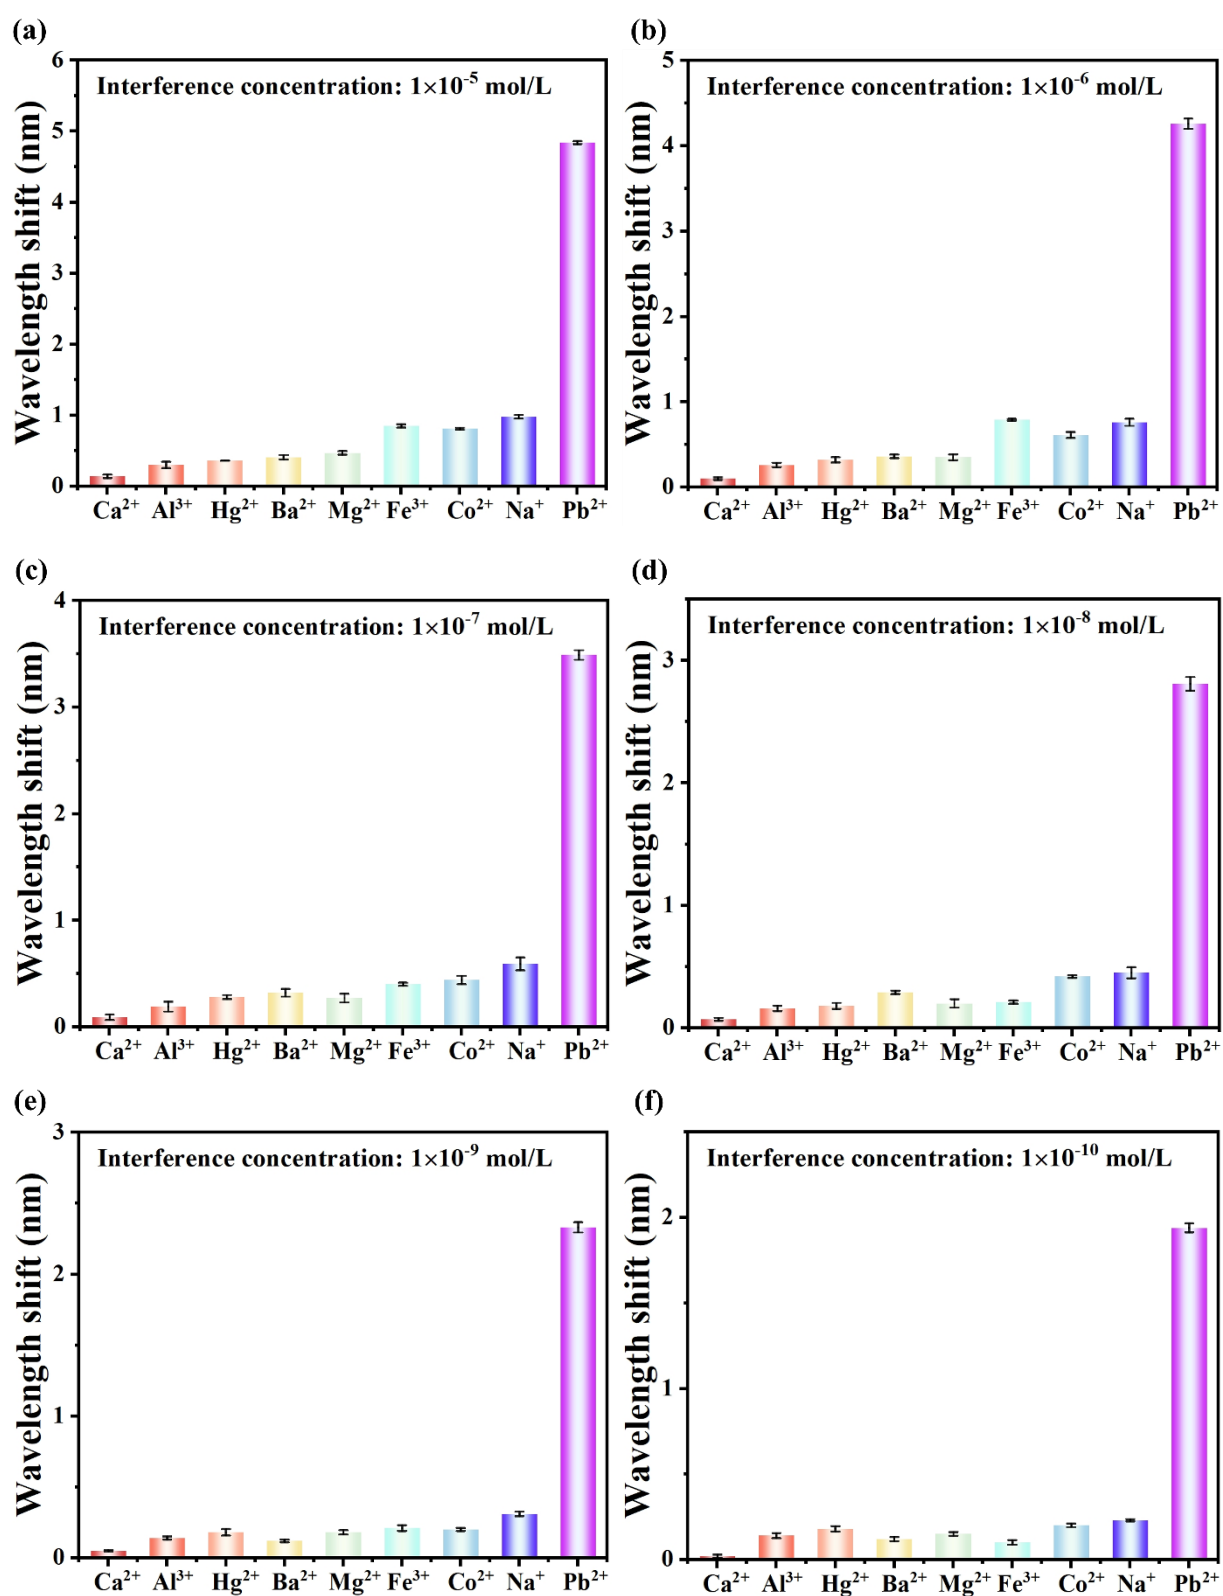

**Figure S11.** The specificity tests of the sensor for different metal ions at different concentrations. (a) At  $1 \times 10^{-5}$  mol/L. (b) At  $1 \times 10^{-6}$  mol/L. (c) At  $1 \times 10^{-7}$  mol/L. (d) At  $1 \times 10^{-8}$  mol/L. (e) At  $1 \times 10^{-9}$  mol/L. (f) At  $1 \times 10^{-10}$  mol/L.
